# Supplementary material for: Randomness in the Bedroom: There Is No Evidence for Fertility Control in Pre-Industrial England
Source: Springer Nature journal article supplement (doi:10.1007/s13524-019-00786-2), 2019-06-17
Supplement: MOESM1 [file 16821110]

# Appendix [Online]

## A Extra Tables and Figures

**Table A1** Summary Statistics, Complex Simulation Data

| Statistic   | N      | Mean  | St. Dev. | Min | Max  |
|-------------|--------|-------|----------|-----|------|
| Age         | 40,545 | 35.86 | 8.00     | 20  | 49   |
| Fecundity   | 40,545 | 1.00  | .30      | .10 | 1.94 |
| Birth       | 40,545 | .21   | .41      | 0   | 1    |
| Child Death | 40,545 | .08   | .28      | 0   | 1    |
| Parity      | 40,545 | 3.97  | 2.75     | 0   | 19   |
| Net Parity  | 40,545 | 2.36  | 1.90     | 0   | 16   |

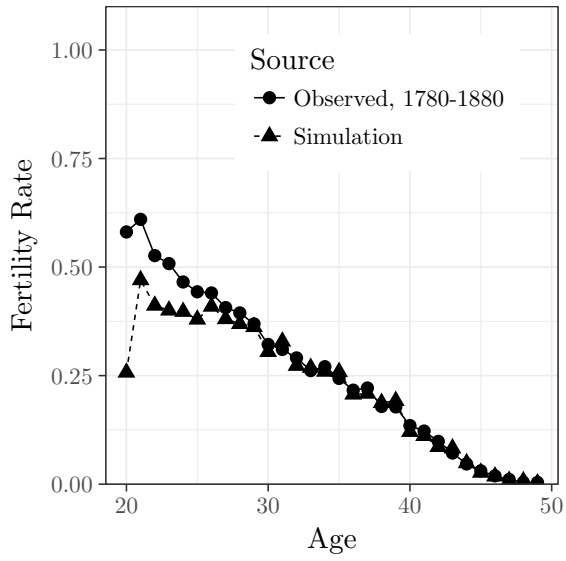

(a) Age Specific Fertility

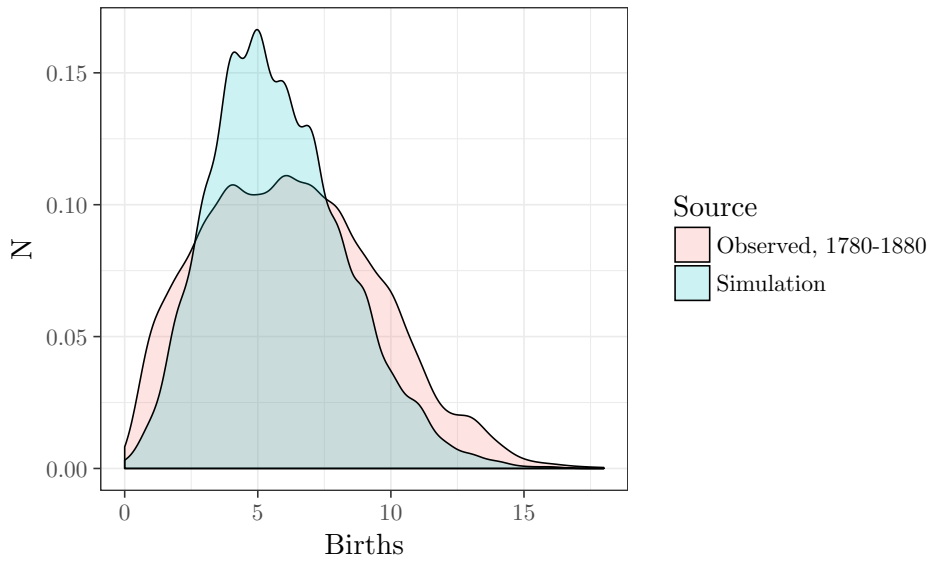

(b) Distribution of Births

**Figure A1** Simulation Calibration

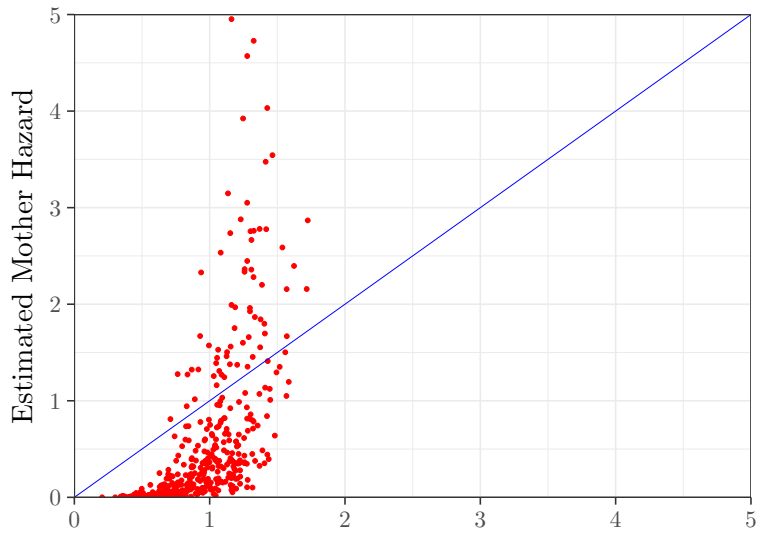

(a) All Ages

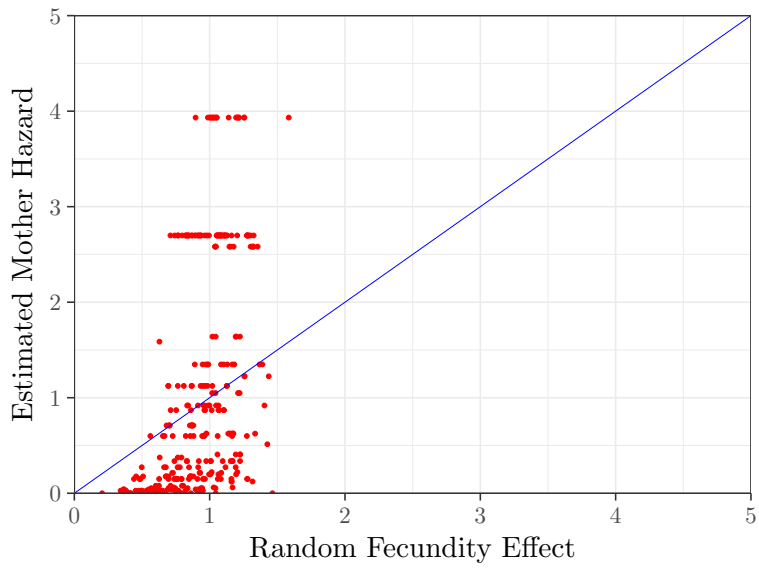

(b) Ages 30-4

**Figure A2** Programmed Versus Estimated Mother Fecundity, Simulation

**Table A2** An Alternative CKW Table 5

|                                     | (1)                 | (2)                 | (3)                 | (4)                 | (5)                 |
|-------------------------------------|---------------------|---------------------|---------------------|---------------------|---------------------|
|                                     | 30-4                | 30-3                | 30-8                | 30-4                | 30-4                |
| Real wage (std)                     | 1.098<br>(0.121)    | 0.910<br>(0.172)    | 1.217***<br>(0.065) | 1.071<br>(0.051)    | 1.151<br>(0.127)    |
| Dummy for net parity 2              | 0.319***<br>(0.037) | 0.220***<br>(0.041) | 0.530***<br>(0.034) | 0.396***<br>(0.031) | 0.174***<br>(0.034) |
| Dummy for net parity 3              | 0.151***<br>(0.031) | 0.060***<br>(0.022) | 0.380***<br>(0.038) | 0.229***<br>(0.024) | 0.044***<br>(0.017) |
| Dummy for net parity 4              | 0.055***<br>(0.022) | 0.020***<br>(0.014) | 0.249***<br>(0.043) | 0.135***<br>(0.017) | 0.009***<br>(0.006) |
| Dummy for net parity 5              |                     |                     |                     | 0.068***<br>(0.010) |                     |
| Dummy for Net Parity 6              |                     |                     |                     | 0.045***<br>(0.008) |                     |
| Dummy for Net Parity 7              |                     |                     |                     | 0.028***<br>(0.007) |                     |
| Dummy for Net Parity 8+             |                     |                     |                     | 0.015***<br>(0.005) |                     |
| Indicator for died child            | 3.479***<br>(0.481) | 5.837***<br>(1.218) | 2.915***<br>(0.239) | 3.671***<br>(0.240) | 4.754***<br>(0.801) |
| Indicator for last spacing interval | 0.745**<br>(0.103)  | 0.618**<br>(0.142)  | 0.739***<br>(0.051) | 0.537***<br>(0.045) | 0.598***<br>(0.089) |
| D31                                 |                     |                     |                     |                     | 1.861***<br>(0.287) |
| D32                                 |                     |                     |                     |                     | 1.800***<br>(0.337) |
| D33                                 |                     |                     |                     |                     | 3.276***<br>(0.881) |
| Observations                        | 16,187              | 12,617              | 26,792              | 43,631              | 16,187              |

\*\*\* p&lt;0.01, \*\* p&lt;0.05, \* p&lt;0.1
